# Supplementary material for: Retinal Microvascular Changes in Mild Cognitive Impairment and Alzheimer's Disease: A Systematic Review, Meta-Analysis, and Meta-Regression
Source: PubMed Central journal article supplement (PMC9096234; doi:10.3389/fnagi.2022.860759), 2022-04-28
Supplement: Data_Sheet_1.pdf [file Data_Sheet_1.pdf]

## SUPPLEMENTAL FIGURES

### AD vs Control

#### **A. Superficial Capillary Plexus Vessel Density: Fovea (<1.0 mm to the Fovea)**

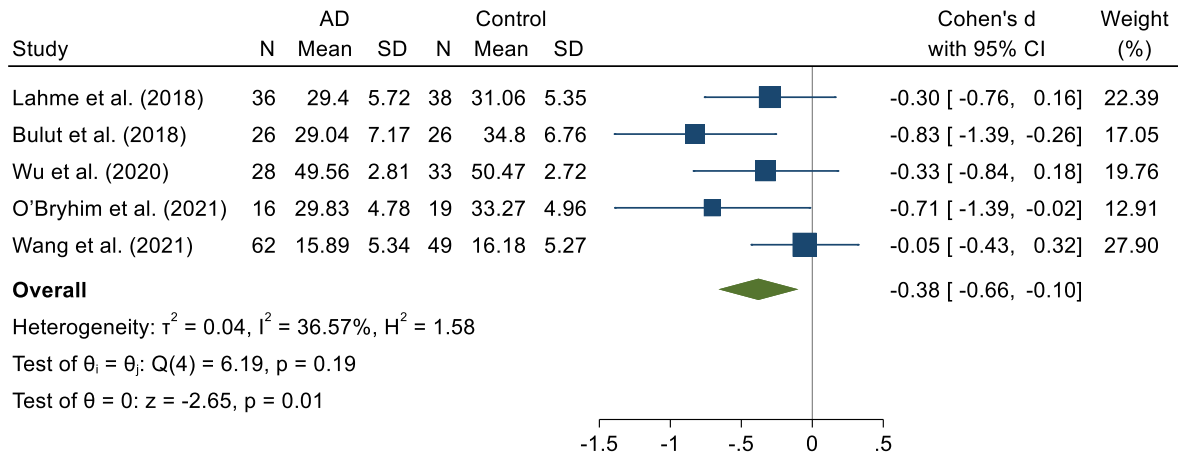

Random-effects REML model

#### **B. Superficial Capillary Plexus Vessel Density: Parafovea region (1.0–3.0 mm to the Fovea)**

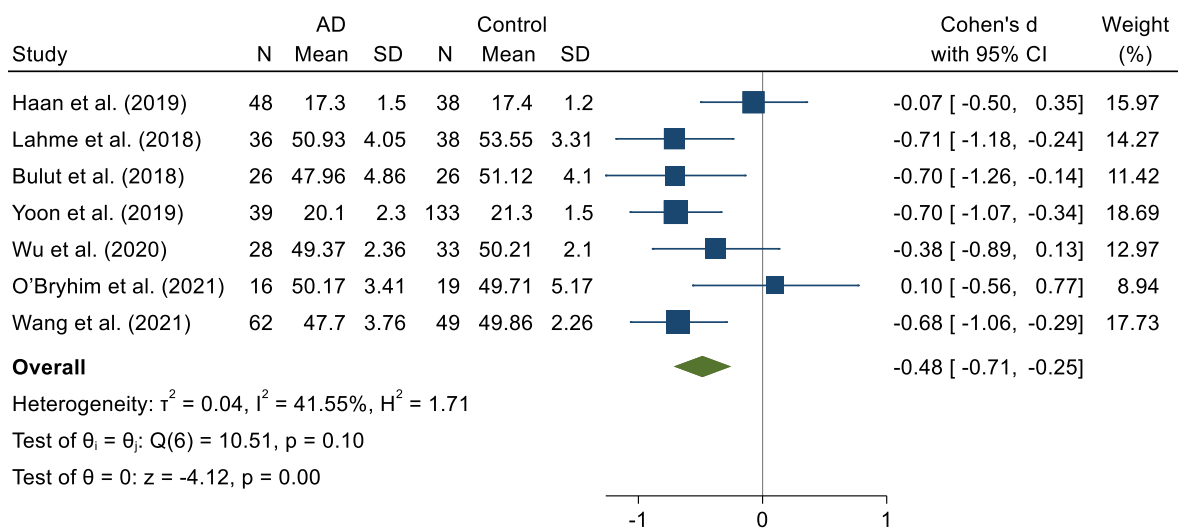

Random-effects REML model

### **Figure S1. Difference in the superficial capillary plexus vessel density between subjects with Alzheimer's Disease (AD) and healthy controls**

The meta-analyses were conducted with a random-effects model. Horizontal bar indicates 95% confidence intervals (CI), and the size of the squares denotes the weight attributed to each article. The diamonds represent the standardized mean differences with the width showing the 95% CI.

## MCI vs Control

### A. Superficial Capillary Plexus Vessel Density: Fovea (<1.0 mm to the Fovea)

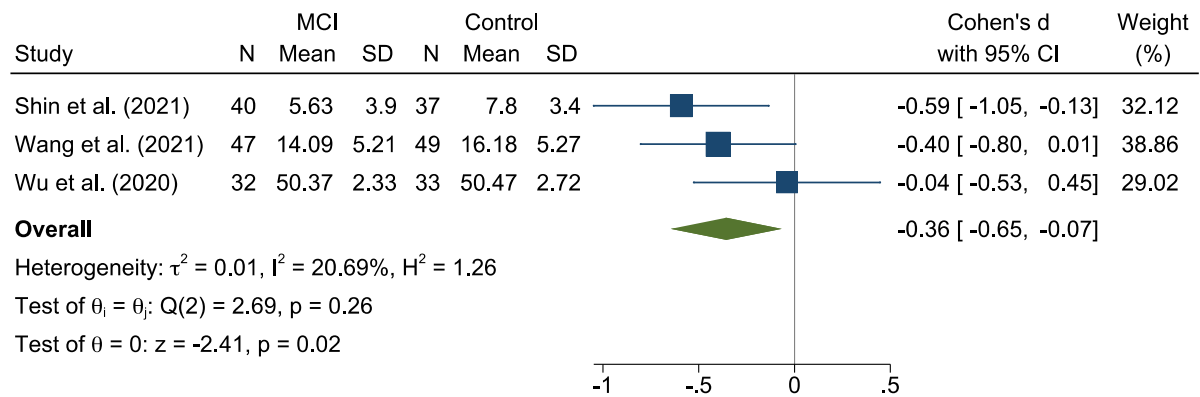

Random-effects REML model

### B. Superficial Capillary Plexus Vessel Density: Parafovea region (1.0–3.0 mm to the Fovea)

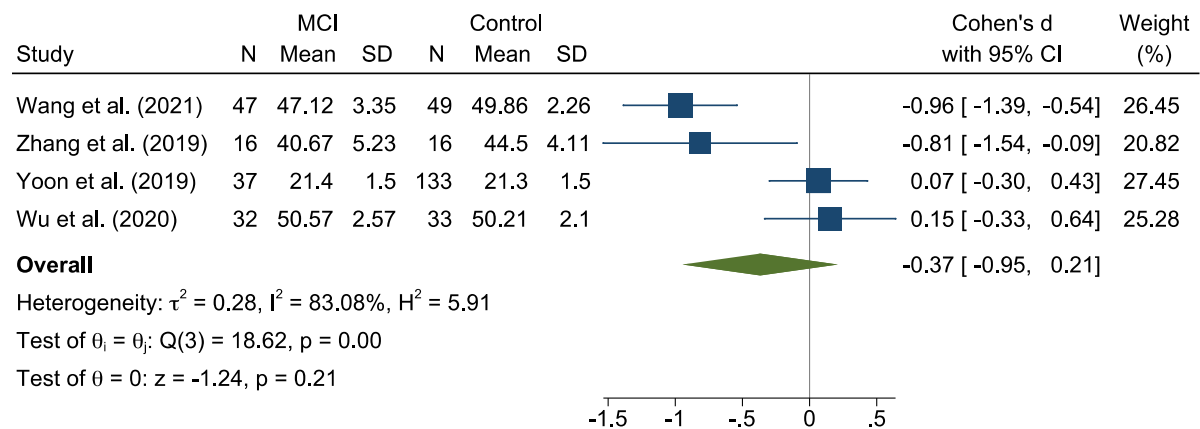

Random-effects REML model

### Figure S2. Difference in the superficial capillary plexus vessel density between subjects with mild cognitive impairment (MCI) and healthy controls

The meta-analyses were conducted with a random-effects model. Horizontal bar indicates 95% confidence intervals (CI), and the size of the squares denotes the weight attributed to each article. The diamonds represent the standardized mean differences with the width showing the 95% CI.

## AD vs MCI

### **A. Superficial Capillary Plexus Vessel Density: Fovea (<1.0 mm to the Fovea)**

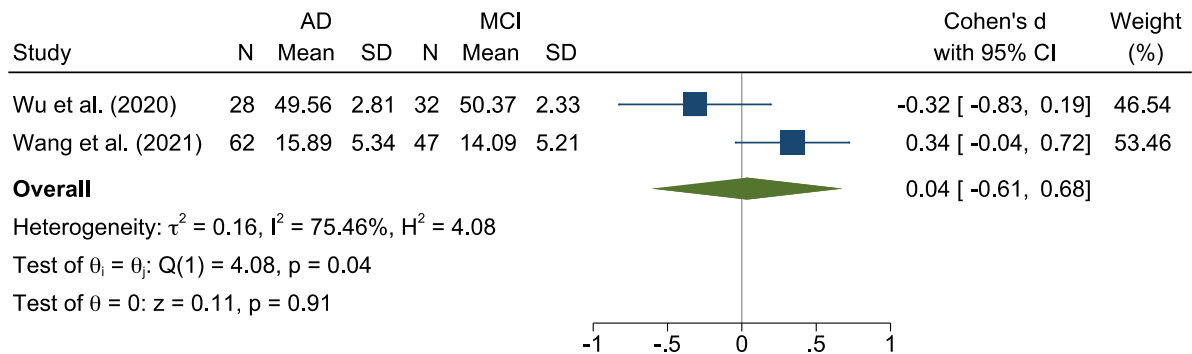

Random-effects REML model

### **B. Superficial Capillary Plexus Vessel Density: Parafovea region (1.0–3.0 mm to the Fovea)**

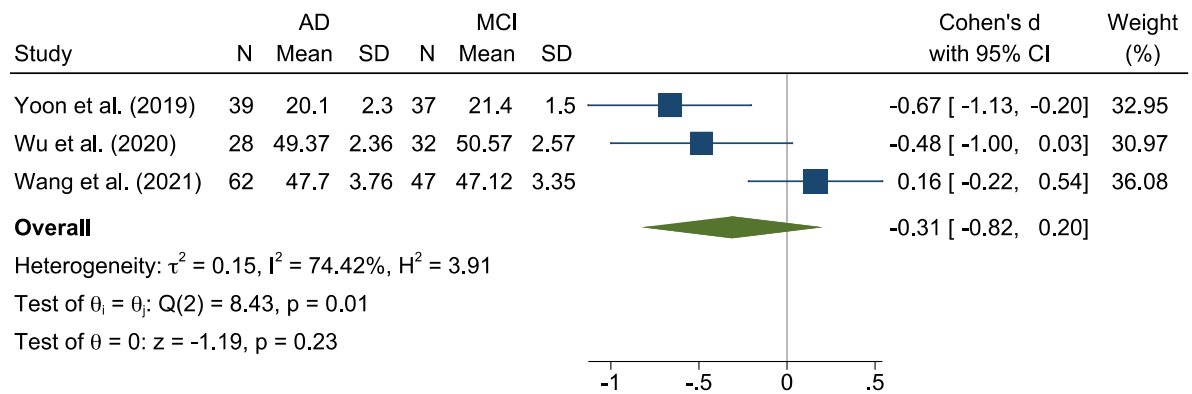

Random-effects REML model

### **Figure S3. Difference in the superficial capillary plexus vessel density between subjects with Alzheimer's Disease (AD) and mild cognitive impairment (MCI)**

The meta-analyses were conducted with a random-effects model. Horizontal bar indicates 95% confidence intervals (CI), and the size of the squares denotes the weight attributed to each article. The diamonds represent the standardized mean differences with the width showing the 95% CI.

### Foveal Avascular Zone Area: AD vs Control

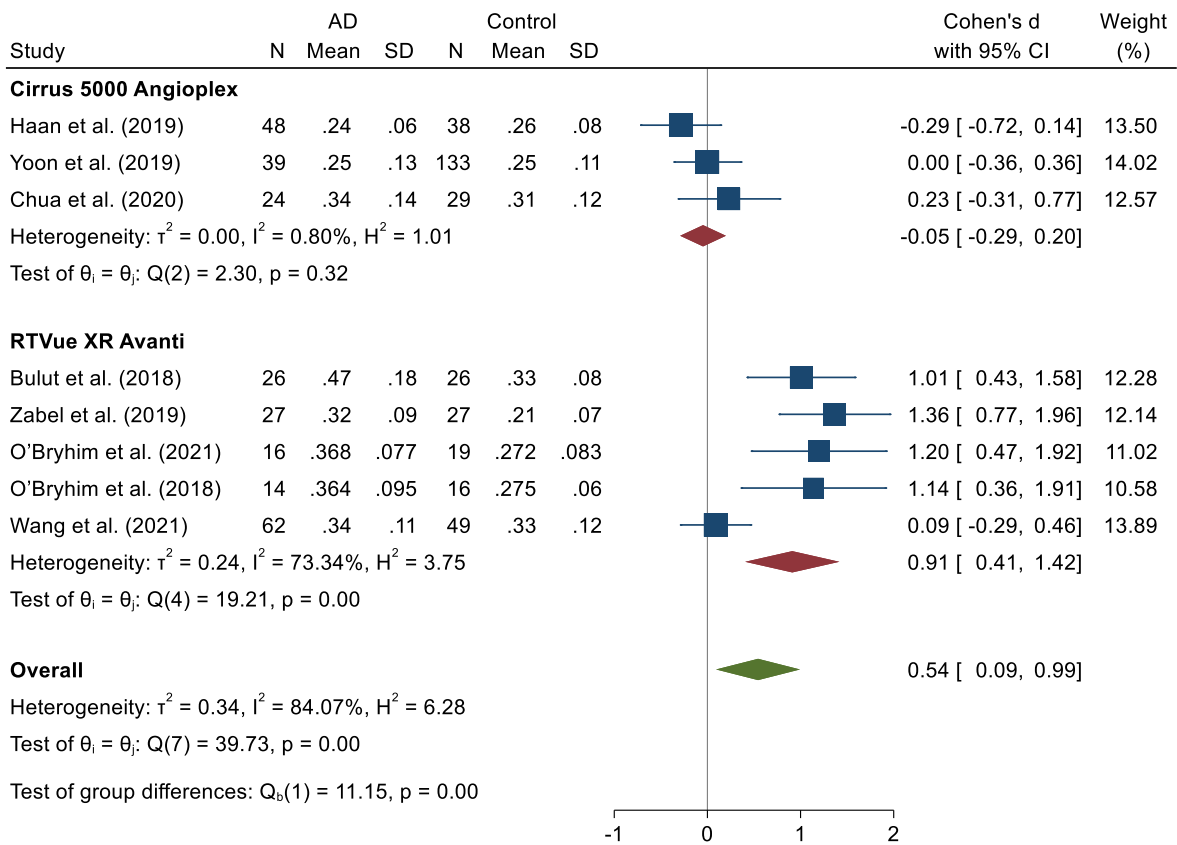

Random-effects REML model

### Foveal Avascular Zone Area: MCI vs Control

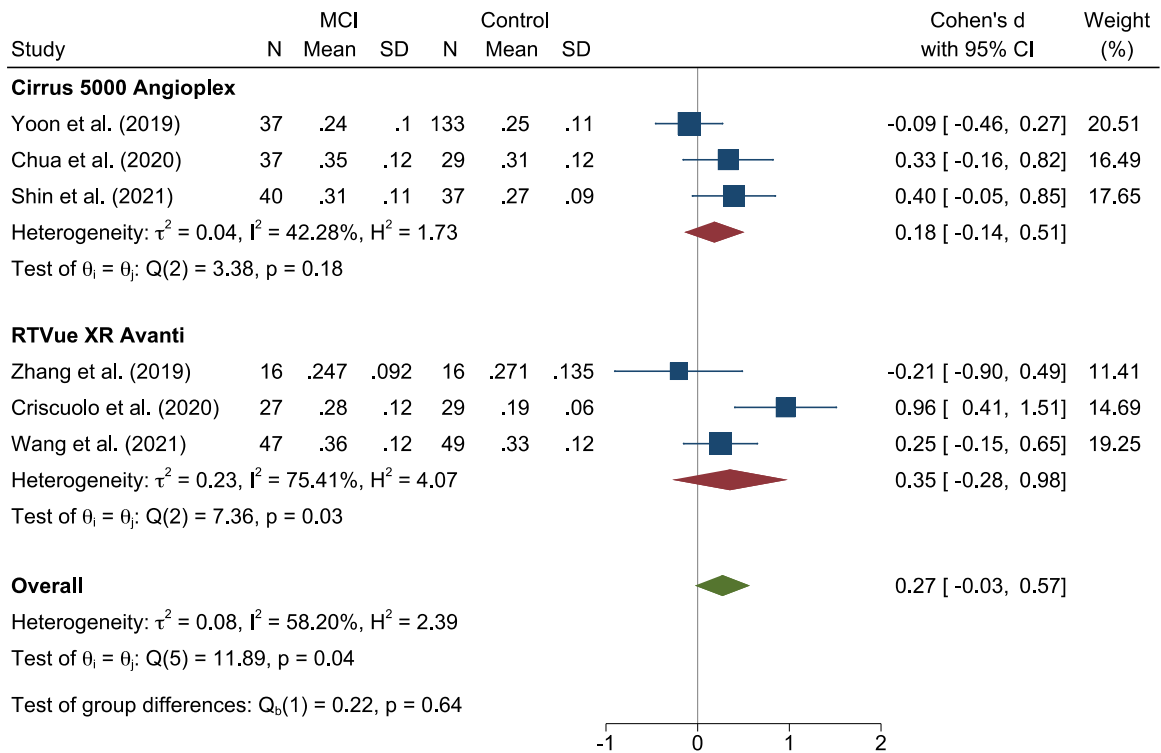

Random-effects REML model

### Foveal Avascular Zone Area: AD vs MCI

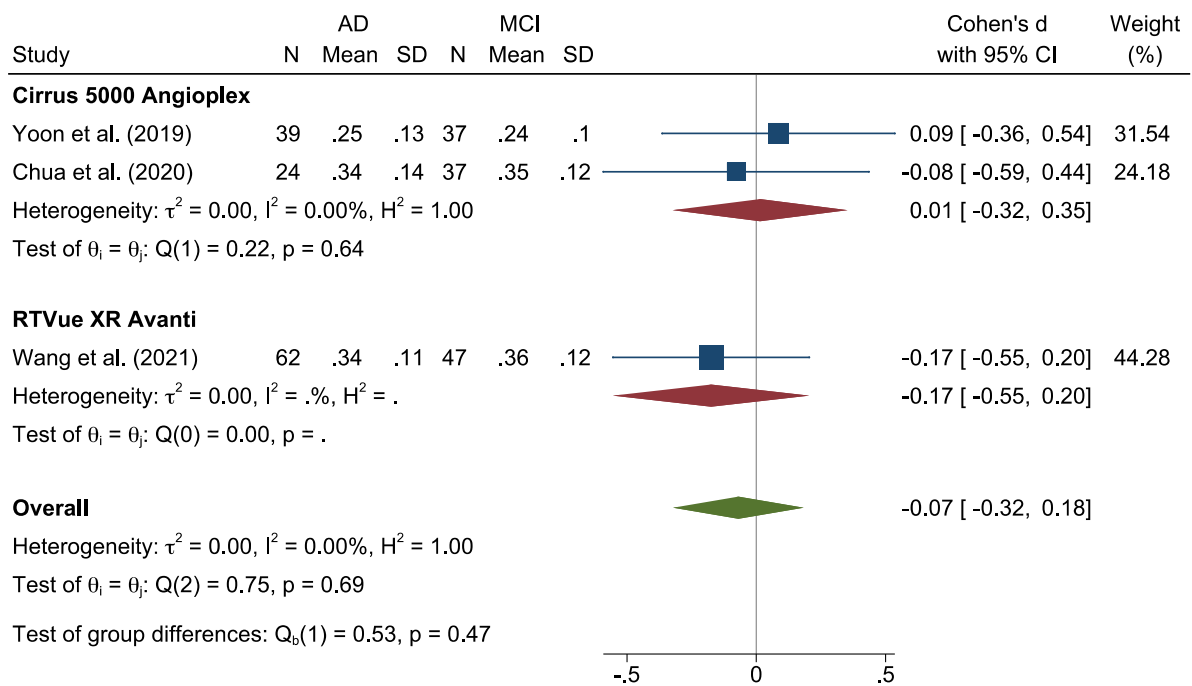

Random-effects REML model

**Figure S4. Subgroup analyses comparing studies using Cirrus 5000 Angioplex and RTVue XR Avanti**

The meta-analyses were conducted with a random-effects model. Horizontal bar indicates 95% confidence intervals (CI), and the size of the squares denotes the weight attributed to each article. The diamonds represent the standardized mean differences with the width showing the 95% CI. Abbreviation: AD = Alzheimer's Disease; MCI = Mild Cognitive Impairment

### Foveal Avascular Zone Area: AD vs Control

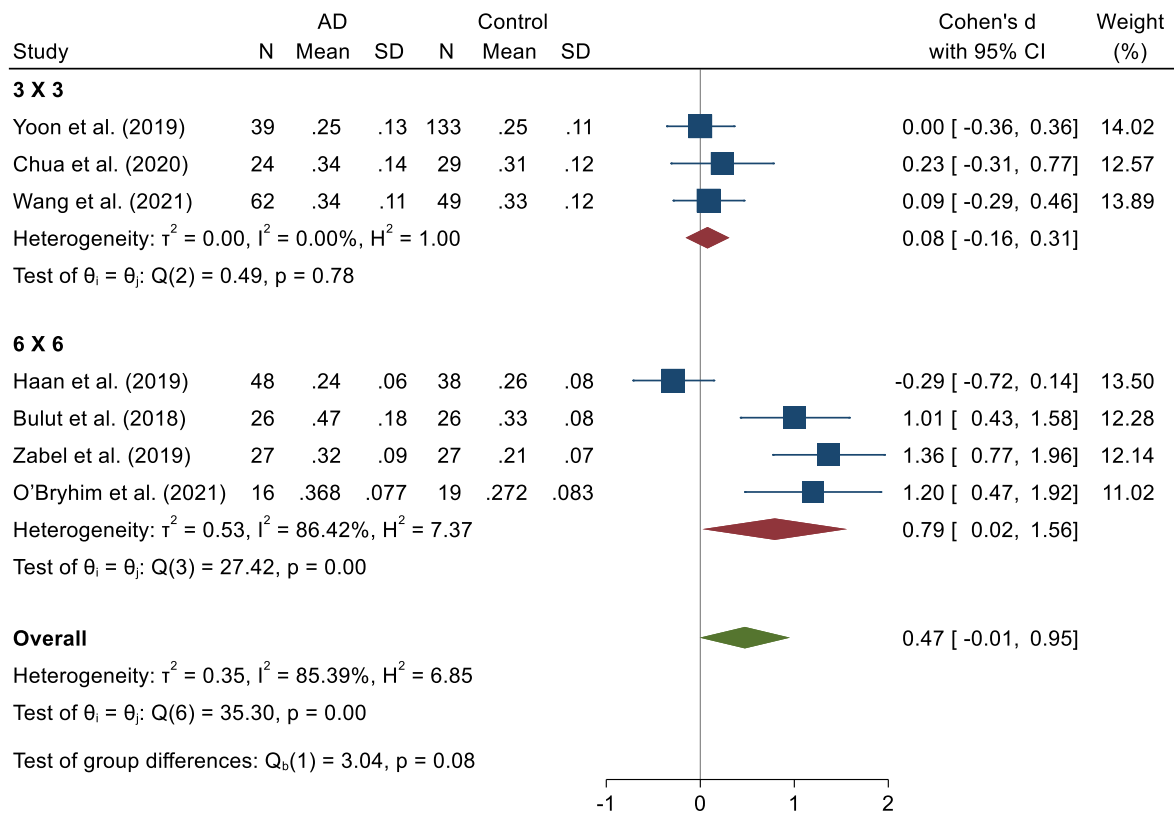

Random-effects REML model

### Foveal Avascular Zone Area: MCI vs Control

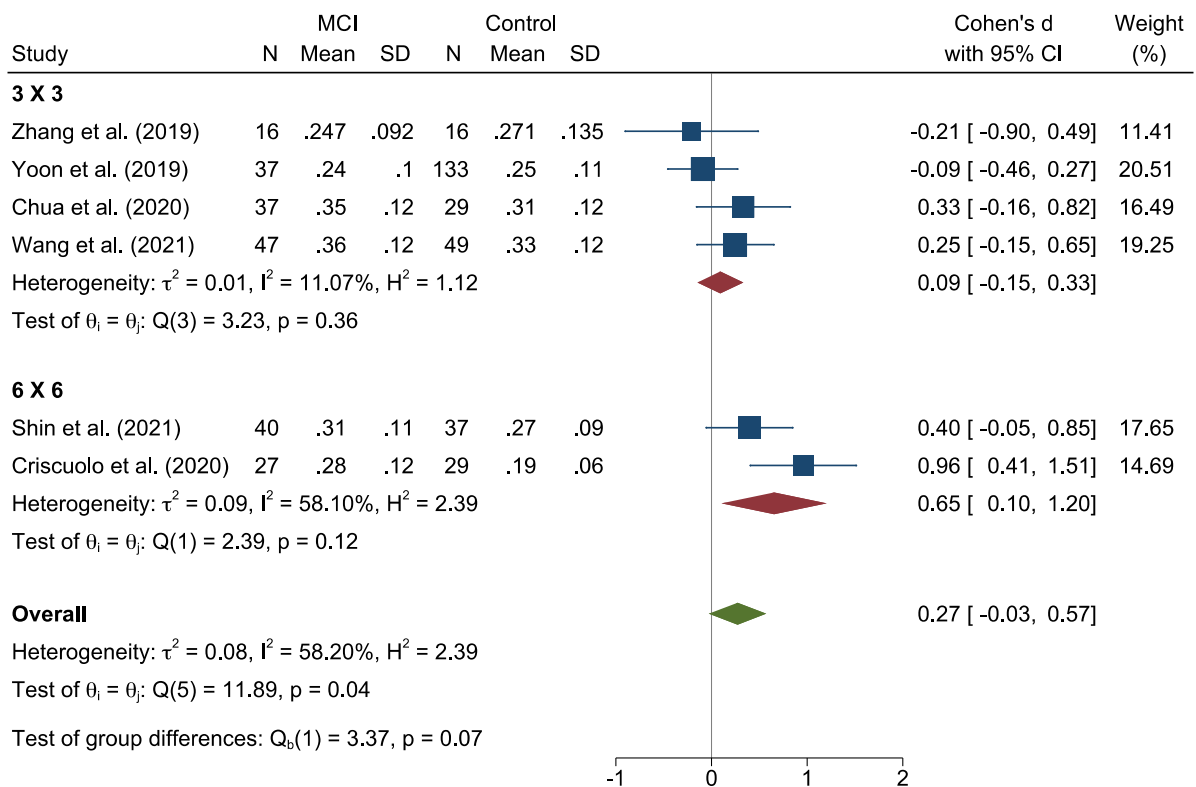

Random-effects REML model

## Superficial Capillary Plexus Vessel Density: AD vs Control

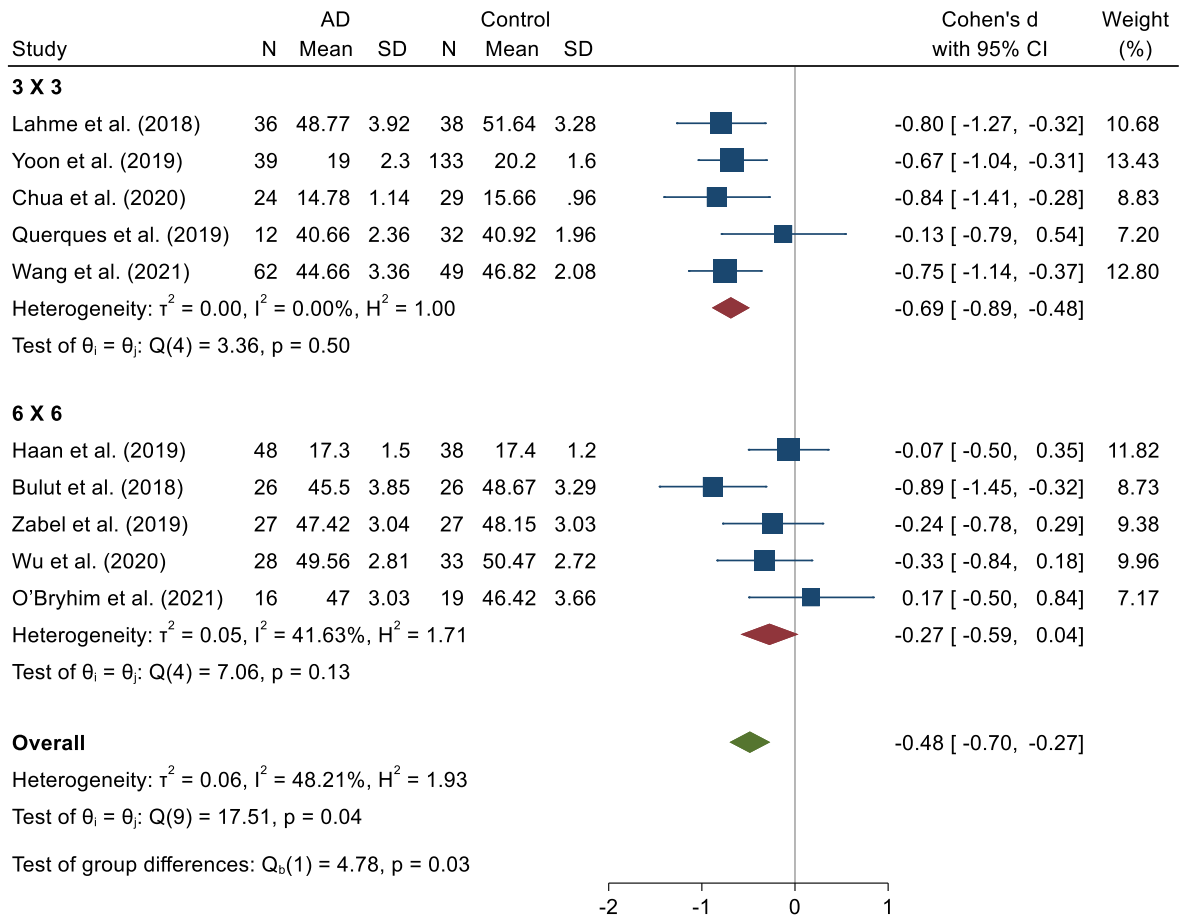

Random-effects REML model

## Superficial Capillary Plexus Vessel Density: MCI vs Control

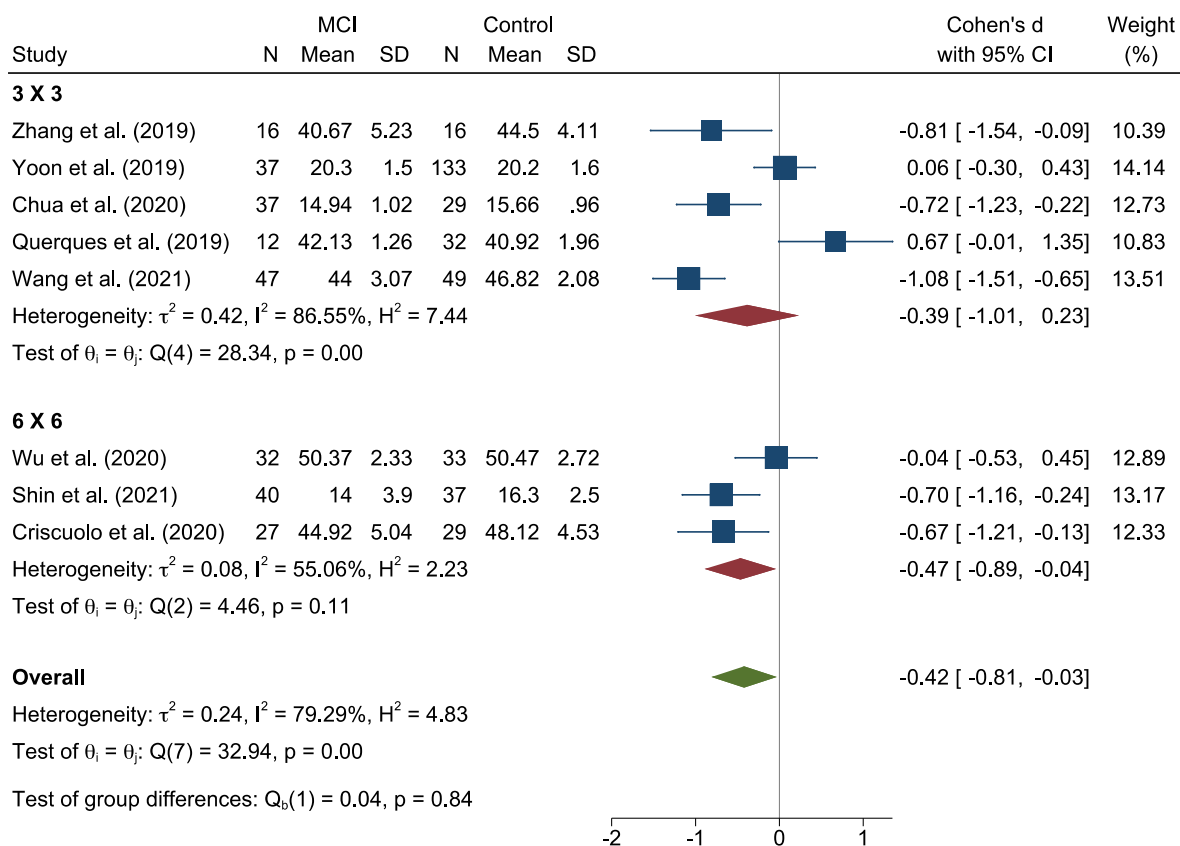

Random-effects REML model

## Superficial Capillary Plexus Vessel Density: AD vs MCI

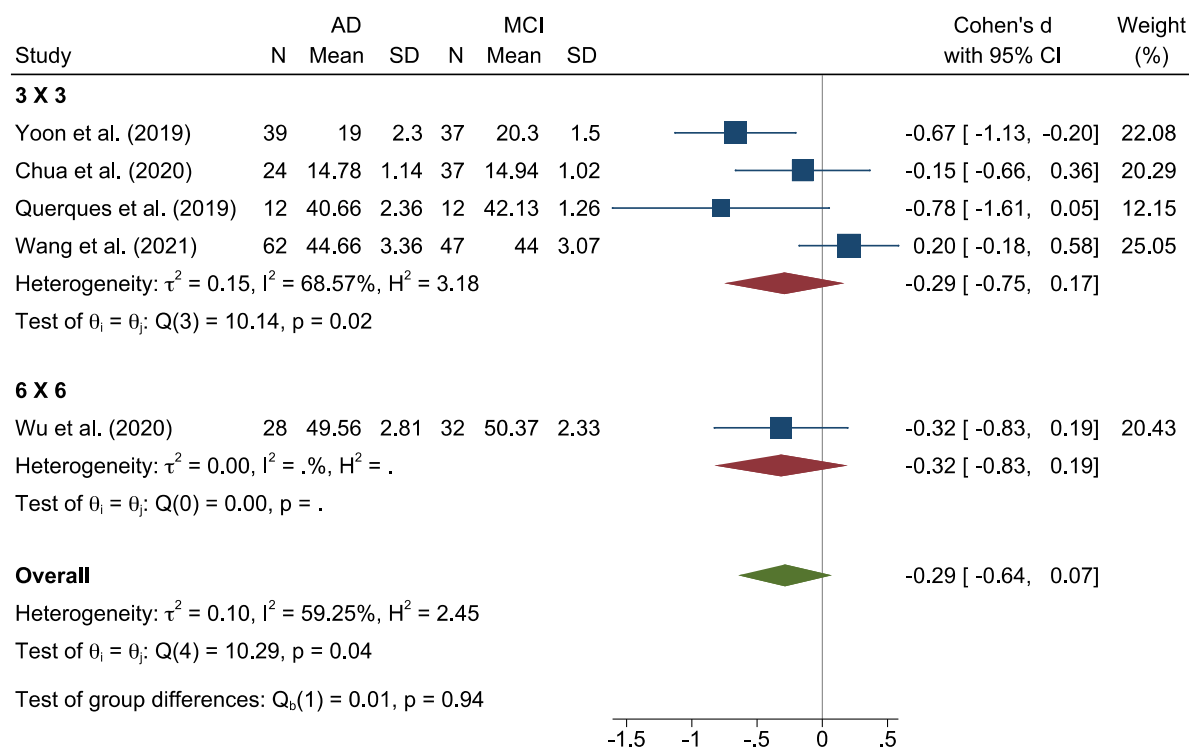

Random-effects REML model



## Deep Capillary Plexus Vessel Density: AD vs Control

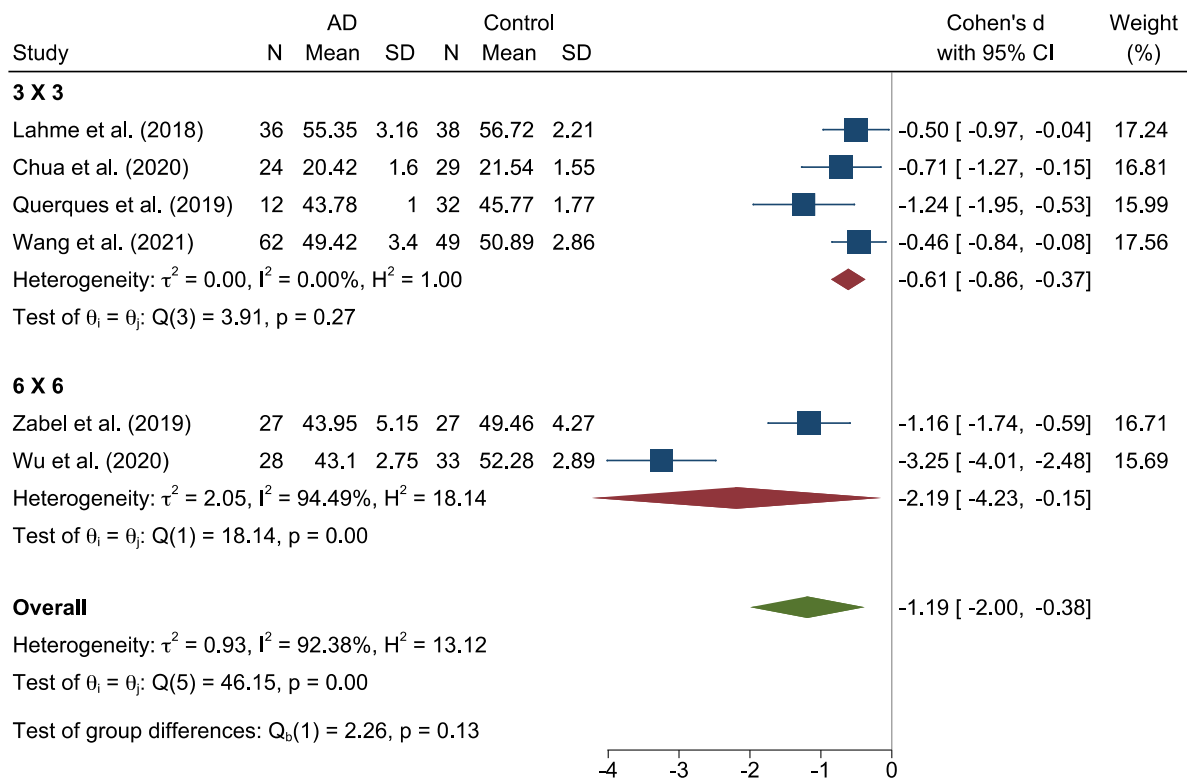

Random-effects REML model

## Deep Capillary Plexus Vessel Density: MCI vs Control

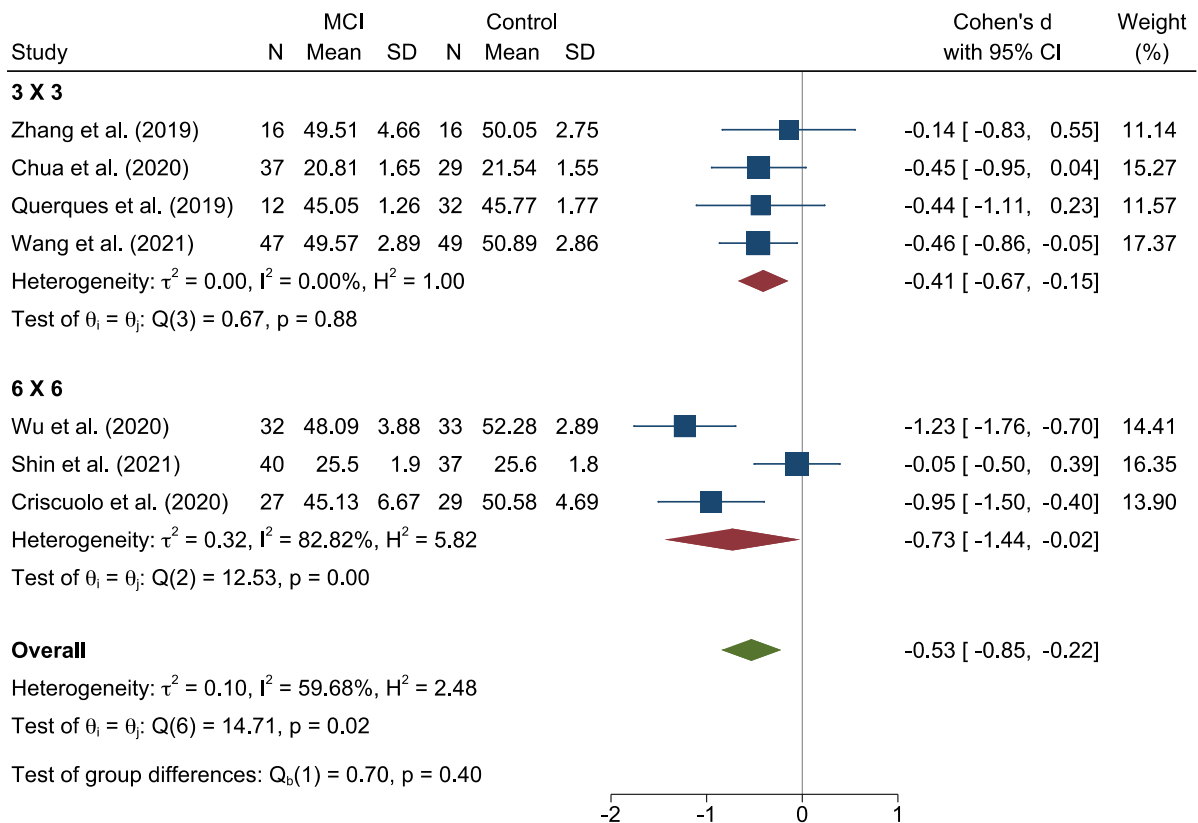

Random-effects REML model

## Deep Capillary Plexus Vessel Density: AD vs MCI

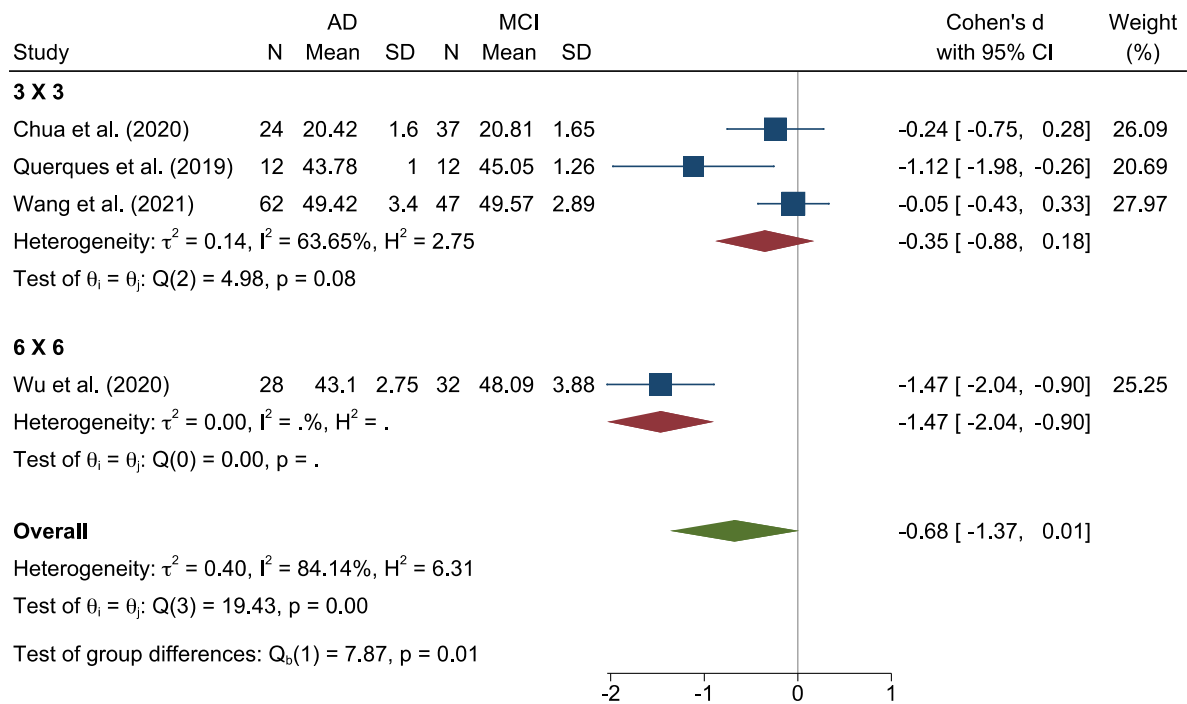

Random-effects REML model

**Figure S5. Subgroup analyses comparing studies with macular scan size of 3x3 mm and 6x6 mm**

The meta-analyses were conducted with a random-effects model. Horizontal bar indicates 95% confidence intervals (CI), and the size of the squares denotes the weight attributed to each article. The diamonds represent the standardized mean differences with the width showing the 95% CI. Abbreviation: AD = Alzheimer's Disease; MCI = Mild Cognitive Impairment
